# Supplementary material for: Association between fatty acids and female infertility: dual evidence from a cross-sectional study and Mendelian randomization analysis
Source: Royal Society of Chemistry journal article supplement (doi:10.1039/d4fo04020a), 2024-12-02
Supplement: d4fo04020a2.xlsx [file d4fo04020a2.xlsx]

## Sheet: Table S1
Table S1. The summary of genome-wide association studies (GWAS) involved in the study.
Trait	GWAS ID	Consortium	Author	Year	Cases	Controls	Sex	Sample size	Number of SNPs	Ethnicity
Saturated fatty acids	met-d-SFA	NA	Borges CM	2020	NA	NA	Males and Females	114999	12321875	European
Monounsaturated fatty acids	met-d-MUFA	NA	Borges CM	2020	NA	NA	Males and Females	114999	12321875	European
Polyunsaturated fatty acids	met-d-PUFA	NA	Borges CM	2020	NA	NA	Males and Females	114999	12321875	European
Omega-3 fatty acids	met-d-Omega_3	NA	Borges CM	2020	NA	NA	Males and Females	114999	12321875	European
Omega-6 fatty acids	met-d-Omega_6	NA	Borges CM	2020	NA	NA	Males and Females	114999	12321875	European
Ratio of omega-3 fatty acids to total fatty acids	met-d-Omega_3_pct	NA	Borges CM	2020	NA	NA	Males and Females	114999	12321875	European
Ratio of omega-6 fatty acids to total fatty acids	met-d-Omega_6_pct	NA	Borges CM	2020	NA	NA	Males and Females	114999	12321875	European
Ratio of monounsaturated fatty acids to total fatty acids	met-d-MUFA_pct	NA	Borges CM	2020	NA	NA	Males and Females	114999	12321875	European
Ratio of polyunsaturated fatty acids to total fatty acids	met-d-PUFA_pct	NA	Borges CM	2020	NA	NA	Males and Females	114999	12321875	European
Current tobacco smoking	ukb-b-223	MRC-IEU	Ben Elsworth	2018	NA	NA	Males and Females	462434	9851867	European
Alcohol intake frequency	ukb-a-25	Neale Lab	Neale	2017	NA	NA	Males and Females	336965	10894596	European
Body mass index	ukb-a-248	Neale Lab	Neale	2017	NA	NA	Males and Females	336107	10894596	European
Mood disorders	ukb-b-18336	MRC-IEU	Ben Elsworth	2018	53414	407288	Males and Females	460702	9851867	European
Insomnia	ukb-a-13	Neale Lab	Neale	2017	NA	NA	Males and Females	336965	10894596	European
Female infertility	finn-b-N14_FEMALEINFERT	FinnGen biobank	NA	2021	6481	68969	Males and Females	75450	16377038	European

## Sheet: Table S2
Table S2. The baseline characteristics of participants based on age subgroups.
Characteristic	18-34 years			35-45 years
	Control	Infertility	P-value	Control	Infertility	P-value
	（N = 25,125,892）	（N = 2,474,866）		（N = 13,562,192）	（N = 2,585,549）
Race			0.71			0.65
Mexican American	253 (11.40%)	28 (12.06%)		215 (14.40%)	33 (13.80%)
Other Hispanic	181 (8.25%)	16 (9.01%)		117 (8.20%)	19 (6.43%)
Non-Hispanic White	577 (55.67%)	64 (56.90%)		320 (53.70%)	61 (54.01%)
Non-Hispanic Black	404 (13.47%)	46 (15.22%)		251 (13.82%)	42 (14.38%)
Non-Hispanic Asian	212 (7.19%)	11 (3.58%)		127 (6.73%)	26 (5.74%)
Other/Multiracial	98 (4.02%)	4 (3.24%)		41 (3.15%)	13 (5.65%)
BMI			<0.001			0.33
Underweight (<18.5 kg/m2)	63 (3.51%)	4 (2.18%)		15 (1.15%)	1 (0.55%)
Normal (18.5 to <25 kg/m2)	614 (38.72%)	42 (24.51%)		290 (30.55%)	54 (24.51%)
Overweight (25 to <30 kg/m2)	432 (25.10%)	28 (15.58%)		257 (24.41%)	35 (21.69%)
Obese (30 or greater kg/m2)	612 (32.67%)	95 (57.73%)		499 (43.89%)	104 (53.25%)
Educational level			0.36			0.68
Less than high school	193 (7.87%)	29 (11.26%)		205 (13.56%)	29 (12.14%)
High school	357 (21.52%)	40 (24.20%)		190 (18.41%)	33 (16.42%)
More than high school	1,175 (70.61%)	100 (64.54%)		676 (68.03%)	132 (71.43%)
Marital status			<0.001			0.02
Married/Living with partner	797 (47.41%)	114 (72.92%)		700 (68.54%)	148 (77.33%)
Widowed/Divorced/Separated	93 (4.70%)	9 (4.83%)		173 (16.45%)	30 (17.33%)
Never married	835 (47.89%)	46 (22.25%)		198 (15.01%)	16 (5.34%)
PIR	2.60 ± 1.65	2.34 ± 1.45	0.21	2.78 ± 1.71	3.21 ± 1.64	0.03
Drinking status			0.09			0.19
Never drinker	945 (51.13%)	84 (47.55%)		542 (50.12%)	110 (58.58%)
Former drinker	398 (19.97%)	49 (30.10%)		317 (26.58%)	60 (24.73%)
Current drinker	382 (28.90%)	36 (22.35%)		212 (23.31%)	24 (16.69%)
Smoking status			0.09			0.45
Never smoker	1,282 (72.92%)	107 (63.18%)		731 (61.90%)	131 (68.39%)
Former smoker	142 (9.05%)	20 (13.60%)		158 (19.33%)	26 (16.18%)
Current smoker	300 (18.03%)	42 (23.21%)		181 (18.77%)	37 (15.42%)
History of PID			0.01			0.19
Yes	56 (2.87%)	13 (8.82%)		57 (5.60%)	19 (9.15%)
No	1,663 (97.13%)	156 (91.18%)		1,006 (94.40%)	173 (90.85%)
Regular periods			0.14			0.44
Yes	1,623 (95.21%)	157 (92.57%)		999 (92.64%)	186 (94.86%)
No	102 (4.79%)	12 (7.43%)		72 (7.36%)	8 (5.14%)
Depression			0.55			0.13
Yes	154 (10.08%)	27 (11.75%)		109 (10.25%)	27 (16.16%)
No	1,566 (89.92%)	142 (88.25%)		961 (89.75%)	167 (83.84%)
Sleeplessness			0.11			0.03
Yes	323 (21.22%)	46 (30.38%)		278 (27.16%)	69 (38.98%)
No	1,402 (78.78%)	123 (69.62%)		793 (72.84%)	125 (61.02%)
Cotinine (ng/mL)	37.43 ± 93.89	50.87 ± 103.07	0.11	44.11 ± 104.66	35.04 ± 98.39	0.47
Calories intake (kcal)	1,871.47 ± 642.73	1,901.50 ± 618.53	0.56	1,862.80 ± 628.23	1,882.00 ± 644.37	0.67
Diabetes			<0.001			0.02
Yes	50 (2.25%)	16 (8.84%)		97 (6.56%)	24 (12.11%)
No	1,675 (97.75%)	153 (91.16%)		974 (93.44%)	170 (87.89%)
Hypertension			0.14			0.31
Yes	160 (7.81%)	24 (11.72%)		218 (16.47%)	45 (20.48%)
No	1,565 (92.19%)	145 (88.28%)		853 (83.53%)	149 (79.52%)
Hypercholesteremia			0.11			0.1
Yes	160 (8.62%)	21 (13.77%)		198 (18.17%)	47 (26.07%)
No	1,565 (91.38%)	148 (86.23%)		873 (81.83%)	147 (73.93%)
Physical activity			0.11			0.76
Insufficient	428 (20.57%)	54 (26.93%)		373 (28.88%)	69 (30.20%)
Sufficient	1,297 (79.43%)	115 (73.07%)		698 (71.12%)	125 (69.80%)
Sedentary behavior			0.16			0.55
Yes	818 (46.49%)	85 (54.67%)		561 (51.36%)	89 (48.08%)
No	907 (53.51%)	84 (45.33%)		510 (48.64%)	105 (51.92%)
TSFA (g)	25.53 ± 11.55	25.90 ± 10.36	0.46	25.44 ± 12.04	26.48 ± 12.06	0.32
Total MUFA (g)	17.83 ± 9.20	18.16 ± 8.89	0.73	17.85 ± 8.77	18.01 ± 9.07	0.99
Total PUFA (g)	24.27 ± 11.54	25.06 ± 10.50	0.18	23.59 ± 11.90	24.05 ± 11.01	0.56
Toal omega-3 (g)	1.77 ± 1.07	1.73 ± 1.01	0.77	1.77 ± 0.94	1.74 ± 1.07	0.5
Total omega-6 (g)	15.21 ± 8.56	17.25 ± 8.06	0.01	15.12 ± 8.40	17.05 ± 7.84	0.01
Omega-3/TFA	0.03 ± 0.01	0.02 ± 0.01	0.43	0.03 ± 0.01	0.03 ± 0.01	0.33
Omega-6/TFA	0.22 ± 0.07	0.25 ± 0.10	0.01	0.22 ± 0.07	0.26 ± 0.09	0.01
MUFA/TFA	0.38 ± 0.05	0.38 ± 0.04	0.84	0.38 ± 0.05	0.38 ± 0.05	0.57
PUFA/TFA	0.26 ± 0.07	0.26 ± 0.06	0.71	0.27 ± 0.06	0.26 ± 0.07	0.55
Abbreviations: BMI: body mass index; PIR: poverty income ratio; PID: pelvic inflammatory disease; TSFAs: total saturated fatty acids; MUFAs: monounsaturated fatty acids; PUFAs: polyunsaturated fatty acids; TFA: total fatty acids. P in bold indicates statistical significance.

## Sheet: Table S3
Table S3. The baseline characteristics of participants based on BMI subgroups.
Characteristic	BMI < 25 kg/m2			BMI ≥ 25 kg/m2
	Control	Infertility	P-value	Control	Infertility	P-value
	(N = 15,005,001)	(N = 1,308,561)		(N = 23,683,083)	(N = 3,751,855)
Age (years)	29.78 ± 7.30	34.51 ± 6.34	<0.001	31.88 ± 7.09	33.97 ± 6.36	<0.001
Race			0.42			0.84
Mexican American	97 (7.38%)	8 (4.08%)		371 (15.67%)	53 (16.04%)
Other Hispanic	119 (8.95%)	13 (8.92%)		179 (7.77%)	22 (7.26%)
Non-Hispanic White	359 (60.15%)	36 (59.92%)		538 (51.71%)	89 (53.85%)
Non-Hispanic Black	161 (8.91%)	22 (15.19%)		494 (16.56%)	66 (14.65%)
Non-Hispanic Asian	216 (11.75%)	20 (9.99%)		123 (4.03%)	17 (2.83%)
Other/Multiracial	44 (2.86%)	2 (1.89%)		95 (4.26%)	15 (5.37%)
Educational level			0.95			0.7
Less than high school	98 (7.31%)	12 (7.48%)		300 (11.48%)	46 (13.18%)
High school	159 (17.04%)	21 (18.05%)		388 (22.58%)	52 (20.98%)
More than high school	739 (75.65%)	68 (74.47%)		1,112 (65.93%)	164 (65.83%)
Marital status			<0.001			<0.001
Married/Living with partner	517 (52.40%)	70 (77.09%)		980 (56.35%)	192 (74.50%)
Widowed/Divorced/ Separated	68 (5.38%)	11 (7.77%)		198 (11.00%)	28 (12.41%)
Never married	411 (42.22%)	20 (15.14%)		622 (32.66%)	42 (13.08%)
PIR	2.88 ± 1.71	3.00 ± 1.58	0.59	2.53 ± 1.64	2.72 ± 1.62	0.1
Drinking status			0.27			0.19
Never drinker	550 (50.65%)	52 (58.95%)		937 (50.86%)	142 (51.17%)
Former drinker	229 (20.67%)	28 (23.70%)		486 (23.31%)	81 (28.63%)
Current drinker	217 (28.68%)	21 (17.35%)		377 (25.83%)	39 (20.19%)
Smoking status			0.36			0.42
Never smoker	745 (71.34%)	65 (67.97%)		1,268 (67.61%)	173 (65.10%)
Former smoker	96 (11.82%)	9 (8.42%)		204 (13.18%)	37 (17.19%)
Current smoker	154 (16.84%)	27 (23.61%)		327 (19.21%)	52 (17.71%)
History of PID			0.06			0.02
Yes	28 (2.06%)	7 (4.45%)		85 (4.94%)	25 (10.58%)
No	961 (97.94%)	94 (95.55%)		1,708 (95.06%)	235 (89.42%)
Regular periods			0.04			0.32
Yes	944 (95.90%)	92 (89.13%)		1,678 (93.30%)	251 (95.35%)
No	52 (4.10%)	9 (10.87%)		122 (6.70%)	11 (4.65%)
Depression			0.44			0.21
Yes	69 (7.77%)	13 (10.44%)		194 (11.63%)	41 (15.25%)
No	921 (92.23%)	88 (89.56%)		1,606 (88.37%)	221 (84.75%)
Sleeplessness			0.42			0.01
Yes	182 (19.78%)	20 (25.12%)		419 (25.53%)	95 (38.14%)
No	814 (80.22%)	81 (74.88%)		1,381 (74.47%)	167 (61.86%)
Cotinine (ng/mL)	41.87 ± 106.37	68.21 ± 134.62	>0.99	38.54 ± 92.26	34.63 ± 85.99	0.92
Calories (kcal)	1,841.21 ± 636.41	1,878.50 ± 550.83	0.33	1,885.68 ± 637.93	1,896.08 ± 657.62	0.86
Diabetes			<0.001			<0.001
Yes	11 (0.66%)	4 (4.59%)		136 (5.72%)	36 (12.57%)
No	985 (99.34%)	97 (95.41%)		1,664 (94.28%)	226 (87.43%)
Hypertension			<0.001			0.71
Yes	58 (4.35%)	13 (16.21%)		320 (14.96%)	56 (16.19%)
No	938 (95.65%)	88 (83.79%)		1,480 (85.04%)	206 (83.81%)
Hypercholesteremia			0.1			0.01
Yes	86 (9.36%)	14 (17.70%)		272 (13.62%)	54 (20.88%)
No	910 (90.64%)	87 (82.30%)		1,528 (86.38%)	208 (79.12%)
Physical activity			0.44			0.25
Insufficient	245 (18.00%)	33 (21.57%)		556 (26.96%)	90 (31.05%)
Sufficient	751 (82.00%)	68 (78.43%)		1,244 (73.04%)	172 (68.95%)
Sedentary behavior			0.32			0.5
Yes	497 (50.78%)	51 (57.18%)		882 (46.56%)	123 (49.25%)
No	499 (49.22%)	50 (42.82%)		918 (53.44%)	139 (50.75%)
TSFA (g)	25.26 ± 11.74	25.83 ± 9.35	0.28	25.65 ± 11.71	26.32 ± 11.85	0.44
Toal MUFA (g)	17.74 ± 9.25	17.80 ± 7.49	0.58	17.90 ± 8.92	18.18 ± 9.44	>0.99
Toal PUFA (g)	23.17 ± 11.08	23.91 ± 9.84	0.29	24.58 ± 12.00	24.77 ± 11.07	0.58
Toal omega-3 (g)	1.79 ± 1.08	1.66 ± 0.87	0.59	1.76 ± 0.98	1.77 ± 1.10	0.68
Total omega-6 (g)	15.08 ± 8.66	16.60 ± 6.75	0.02	15.24 ± 8.40	17.34 ± 8.31	0.001
Omega-3/TFA	0.03 ± 0.01	0.02 ± 0.01	0.17	0.03 ± 0.01	0.03 ± 0.01	0.61
Omega-6/TFA	0.23 ± 0.07	0.25 ± 0.12	0.15	0.22 ± 0.07	0.26 ± 0.08	<0.001
MUFA/TFA	0.38 ± 0.05	0.38 ± 0.04	0.62	0.38 ± 0.05	0.38 ± 0.04	0.7
PUFA/TFA	0.27 ± 0.07	0.26 ± 0.06	0.72	0.26 ± 0.06	0.26 ± 0.06	0.77

## Sheet: Table S4
Table S4. The association between various FAs intake and female infertility risk based on age stratification.
	18-34 years			35-45 years
	Crude model	Model 1	Model 2	Crude model	Model 1	Model 2
TSFA (g)
Continuous	0.31 (0.10, 0.95)	0.90 (0.30, 2.69)	0.32 (0.04, 2.60)	0.58 (0.14, 2.42)	0.79 (0.17, 3.63)	0.44 (0.04, 4.72)
Q1	Ref			Ref
Q2	1.19 (0.74, 1.91)	1.44 (0.86, 2.43)	1.57 (0.84, 2.94)	0.68 (0.38, 1.22)	0.71 (0.40, 1.27)	0.58 (0.31, 1.10)
Q3	0.97 (0.55, 1.69)	1.38 (0.78, 2.42)	1.23 (0.58, 2.62)	0.50 (0.26, 0.95)	0.53 (0.27, 1.04)	0.49 (0.22, 1.08)
Q4	0.65 (0.35, 1.21)	1.12 (0.58, 2.14)	0.92 (0.32, 2.67)	0.96 (0.53, 1.74)	1.16 (0.58, 2.30)	1.04 (0.39, 2.75)
MUFA (g)
Continuous	0.26 (0.08, 0.85)	0.82 (0.30, 2.28)	0.33 (0.04, 2.67)	0.79 (0.24, 2.57)	1.19 (0.33, 4.23)	0.62 (0.09, 4.33)
Q1	Ref			Ref
Q2	0.78 (0.39, 1.53)	0.97 (0.49, 1.92)	1.02 (0.47, 2.22)	0.70 (0.39, 1.27)	0.72 (0.39, 1.32)	0.53 (0.25, 1.15)
Q3	0.58 (0.31, 1.07)	0.83 (0.46, 1.53)	0.63 (0.26, 1.54)	0.88 (0.47, 1.66)	1.02 (0.53, 1.96)	1.21 (0.54, 2.67)
Q4	0.56 (0.28, 1.10)	1.04 (0.54, 2.01)	0.76 (0.22, 2.69)	1.09 (0.61, 1.98)	1.40 (0.74, 2.64)	1.80 (0.72, 4.50)
PUFA (g)
Continuous	0.21 (0.04, 0.99)	0.79 (0.21, 3.00)	0.51 (0.06, 4.39)	0.44 (0.10, 1.96)	0.75 (0.14, 4.10)	0.93 (0.08, 10.57)
Q1	Ref			Ref
Q2	0.63 (0.34, 1.17)	0.73 (0.40, 1.35)	0.71 (0.35, 1.42)	0.73 (0.40, 1.34)	0.75 (0.40, 1.40)	0.62 (0.34, 1.11 )
Q3	0.73 (0.37, 1.43)	1.04 (0.55, 1.97)	0.99 (0.46, 2.09)	0.54 (0.30, 0.96)	0.59 (0.31, 1.11)	0.47 (0.25, 0.89)
Q4	0.51 (0.28, 0.94)	0.83 (0.47, 1.48)	0.67 (0.27, 1.66)	0.81 (0.46, 1.42)	0.98 (0.52, 1.82)	0.86 (0.42, 1.73)
Total omega-3 (g)
Continuous	0.93 (0.24, 3.60)	0.91 (0.19, 4.40)	0.78 (0.18, 3.34)	0.88 (0.35, 2.24)	0.86 (0.42, 1.75)	0.76 (0.40, 1.45)
Q1	Ref			Ref
Q2	0.72 (0.38, 1.38)	0.85 (0.44, 1.65)	0.89 (0.41, 1.92)	0.78 (0.44, 1.40)	0.81 (0.45, 1.48)	0.59 (0.29, 1.21)
Q3	0.48 (0.27, 0.86)	0.68 (0.39, 1.18)	0.64 (0.34, 1.20)	0.56 (0.30, 1.04)	0.60 (0.31, 1.18)	0.46 (0.18, 1.16)
Q4	0.60 (0.33, 1.09)	0.96 (0.54, 1.70)	0.72 (0.30, 1.72)	0.65 (0.38, 1.13)	0.76 (0.39, 1.47)	0.66 (0.26, 1.69)
Total omega-6 (g)
Continuous	0.76 (0.19, 3.07)	3.11 (1.05, 9.24)	3.60 (1.03, 12.6)	2.00 (0.51, 7.75)	2.05 (0.52, 8.03)	2.40 (0.76, 7.55)
Q1	Ref			Ref
Q2	0.82 (0.40, 1.70)	0.97 (0.47, 1.98)	1.21 (0.59, 2.45)	1.02 (0.51, 2.05)	1.03 (0.51, 2.10)	1.02 (0.49, 2.12)
Q3	1.16 (0.55, 2.47)	1.57 (0.76, 3.24)	2.00 (0.89, 4.50)	1.24 (0.65, 2.35)	1.32 (0.68, 2.55)	1.60 (0.86, 2.99)
Q4	0.76 (0.38, 1.51)	1.26 (0.67, 2.37)	1.49 (0.63, 3.53)	1.40 (0.80, 2.44)	1.80 (0.97, 3.34)	2.81 (1.57, 5.04)
Omega-3/TFA
Continuous	0.64 (0.23, 1.77)	0.99 (0.57, 1.73)	0.53 (0.20, 1.36)	0.90 (0.35, 2.28)	0.86 (0.43, 1.74)	0.76 (0.40, 1.44)
Q1	Ref			Ref
Q2	1.02 (0.46, 2.27)	1.05 (0.48, 2.29)	1.25 (0.50, 3.17)	0.53 (0.28, 0.99)	0.52 (0.28, 0.97)	0.50 (0.25, 1.02)
Q3	1.13 (0.59, 2.17)	1.15 (0.62, 2.15)	1.17 (0.53, 2.55)	0.73 (0.38, 1.41)	0.73 (0.37, 1.45)	0.74 (0.36, 1.52)
Q4	0.78 (0.35, 1.77)	0.82 (0.37, 1.81)	0.81 (0.36, 1.82)	0.72 (0.37, 1.37)	0.74 (0.38, 1.46)	0.87 (0.41, 1.83)
Omega-6/TFA
Continuous	3.56 (1.63, 10.33)	2.98 (1.95, 4.12)	5.50 (2.52, 11.99)	1.48 (1.16, 4.23)	1.71 (1.18, 5.91)	1.18 (1.13, 5.69)
Q1	Ref			Ref
Q2	3.99 (1.90, 8.40)	4.06 (1.90, 8.69)	5.24 (2.20, 12.48)	0.85 (0.42, 1.71)	0.80 (0.40, 1.59)	0.74 (0.37, 1.48)
Q3	2.83 (1.44, 5.54)	2.84 (1.42, 5.70)	3.75 (1.72, 8.21)	1.78 (0.96, 3.30)	1.82 (0.96, 3.45)	1.98 (1.03, 3.80)
Q4	2.98 (1.32, 6.72)	2.88 (1.26, 6.58)	3.76 (1.50, 9.42)	1.68 (0.84, 3.36)	1.80 (0.89, 3.66)	2.06 (0.98, 4.30)
MUFA/TFA
Continuous	0.99 (0.33, 2.95)	0.96 (0.28, 3.36)	1.91 (0.18, 4.65)	1.28 (0.61, 2.69)	1.00 (0.43, 2.33)	0.86 (0.43, 1.71)
Q1	Ref			Ref
Q2	1.75 (0.97, 3.19)	1.67 (0.93, 2.98)	1.70 (0.82, 3.56)	0.76 (0.43, 1.31)	0.75 (0.43, 1.29)	0.61 (0.33, 1.15)
Q3	1.12 (0.66, 1.90)	1.10 (0.64, 1.88)	1.03 (0.54, 1.98)	1.16 (0.59, 2.31)	1.16 (0.57, 2.37)	0.85 (0.40, 1.85)
Q4	1.26 (0.67, 2.38)	1.31 (0.69, 2.50)	1.28 (0.60, 2.75)	0.92 (0.48, 1.76)	0.93 (0.48, 1.80)	0.94 (0.50, 1.80)
PUFA/TFA
Continuous	0.47 (0.02, 9.64)	0.49 (0.02, 10.1)	0.73 (0.05, 8.74)	0.26 (0.01, 7.60)	0.39 (0.01, 12.65)	0.47 (0.02, 10.47)
Q1	Ref			Ref
Q2	1.13 (0.57, 2.23)	1.14 (0.58, 2.26)	1.15 (0.55, 2.43)	0.59 (0.32, 1.08)	0.57 (0.31, 1.07)	0.58 (0.29, 1.14)
Q3	1.03 (0.56, 1.88)	1.04 (0.57, 1.89)	1.20 (0.62, 2.35)	0.98 (0.55, 1.74)	1.04 (0.58, 1.87)	1.15 (0.65, 2.03)
Q4	0.86 (0.42, 1.77)	0.85 (0.41, 1.74)	0.93 (0.44, 1.98)	0.71 (0.37, 1.36)	0.77 (0.40, 1.49)	0.87 (0.44, 1.72)

## Sheet: Table S5
Table S5. The association between various FAs intake and female infertility risk based on age stratification.
	BMI<25 kg/m2			BMI≥25 kg/m2
	Crude model	Model 1	Model 2	Crude model	Model 1	Model 2
TSFA (g)
Continuous	0.95 (0.38, 2.38)	1.27 (0.45, 3.63)	1.05 (0.12, 9.12)	0.36 (0.12, 1.14)	0.38 (0.12, 1.21)	0.07 (0.01, 0.41)
Q1	Ref			Ref
Q2	1.22 (0.63, 2.34)	1.27 (0.65, 2.51)	1.10 (0.48, 2.52)	0.81 (0.52, 1.26)	0.80 (0.53, 1.22)	0.74 (0.45, 1.24)
Q3	1.84 (0.89, 3.77)	1.82 (0.84, 3.96)	1.71 (0.57, 5.12)	0.72 (0.44, 1.20)	0.72 (0.43, 1.21)	0.55 (0.29, 1.04)
Q4	0.98 (0.42, 2.28)	1.17 (0.49, 2.79)	1.17 (0.26, 5.29)	0.73 (0.45, 1.18)	0.74 (0.46, 1.21)	0.50 (0.25, 1.00)
Total MUFA (g)
Continuous	0.92 (0.40, 2.10)	1.02 (0.41, 2.57)	1.17 (0.21, 6.42)	0.52 (0.15, 1.78)	0.51 (0.15, 1.74)	0.19 (0.03, 1.30)
Q1	Ref			Ref
Q2	1.59 (0.69, 3.68)	1.77 (0.75, 4.16)	2.67 (1.25, 5.74)	1.13 (0.69, 1.84)	1.09 (0.66, 1.81)	0.88 (0.48, 1.62)
Q3	1.78 (0.72, 4.40)	1.81 (0.70, 4.70)	2.63 (0.96, 7.20)	0.93 (0.55, 1.56)	0.96 (0.57, 1.62)	0.83 (0.43, 1.61)
Q4	1.00 (0.47, 2.12)	1.11 (0.51, 2.44)	1.77 (0.58, 5.36)	0.92 (0.57, 1.49)	0.89 (0.56, 1.43)	0.67 (0.35, 1.29)
Total PUFA (g)
Continuous	0.81 (0.24, 2.76)	0.89 (0.23, 3.48)	1.04 (0.17, 6.21)	0.33 (0.07, 1.54)	0.35 (0.07, 1.68)	0.14 (0.02, 1.22)
Q1	Ref			Ref
Q2	2.04 (0.83, 5.01)	1.97 (0.78, 4.96)	3.04 (1.07, 8.65)	0.67 (0.41, 1.09)	0.65 (0.40, 1.07)	0.54 (0.31, 0.95)
Q3	0.58 (0.24, 1.41)	0.56 (0.23, 1.40)	0.78 (0.31, 1.95)	0.49 (0.27, 0.90)	0.49 (0.26, 0.92)	0.39 (0.20, 0.77)
Q4	1.54 (0.71, 3.34)	1.55 (0.67, 3.58)	2.56 (0.71, 9.19)	0.73 (0.45, 1.18)	0.74 (0.45, 1.21)	0.52 (0.28, 0.97)
Total omega-3 (g)
Continuous	0.59 (0.27, 1.29)	0.84 (0.28, 2.47)	0.65 (0.28, 1.49)	0.00 (0.00, 4.73)	0.00 (0.00, 3.86)	0.00 (0.00, 0.68)
Q1	Ref			Ref
Q2	0.40 (0.14, 1.12)	0.39 (0.14, 1.12)	0.52 (0.16, 1.73)	0.76 (0.46, 1.25)	0.73 (0.44, 1.20)	0.65 (0.39, 1.08)
Q3	0.54 (0.28, 1.03)	0.49 (0.26, 0.92)	0.58 (0.25, 1.32)	0.56 (0.32, 0.96)	0.55 (0.32, 0.96)	0.42 (0.24, 0.73)
Q4	0.83 (0.40, 1.74)	0.88 (0.40, 1.95)	0.85 (0.28, 2.55)	0.68 (0.41, 1.13)	0.66 (0.40, 1.10)	0.48 (0.26, 0.88)
Total omega-6 (g)
Continuous	2.24 (0.82, 6.09)	2.36 (0.72, 7.77)	3.47 (0.58, 8.84)	2.16 (0.53, 8.78)	2.48 (0.57, 10.75)	4.02 (0.55, 5.12)
Q1	Ref			Ref
Q2	2.24 (0.76, 6.54)	2.55 (0.86, 7.60)	3.01 (0.68, 10.29)	1.39 (0.78, 2.50)	1.38 (0.76, 2.52)	1.36 (0.69, 2.68)
Q3	1.29 (0.43, 3.91)	1.32 (0.43, 4.12)	1.53 (0.24, 9.66)	1.31 (0.79, 2.17)	1.33 (0.79, 2.23)	1.44 (0.80, 2.60)
Q4	2.86 (1.19, 6.88)	3.01 (1.19, 7.64)	3.56 (1.11, 11.39)	1.67 (1.02, 2.74)	1.73 (1.05, 2.85)	2.09 (1.13, 3.86)
Omega-3/TFA
Continuous	0.60 (0.28, 1.31)	0.34 (0.16, 1.72)	0.83 (0.28, 2.45)	0.67 (0.34, 1.32)	0.92 (0.53, 1.60)	0.86 (0.51, 1.44)
Q1	Ref			Ref
Q2	0.60 (0.27, 1.35)	0.65 (0.28, 1.50)	0.70 (0.27, 1.80)	0.74 (0.36, 1.51)	0.74 (0.36, 1.54)	0.75 (0.35, 1.60)
Q3	0.82 (0.44, 1.53)	0.80 (0.42, 1.52)	0.92 (0.42, 2.02)	0.83 (0.46, 1.49)	0.79 (0.44, 1.43)	0.71 (0.40, 1.26)
Q4	0.65 (0.30, 1.42)	0.72 (0.33, 1.59)	0.78 (0.31, 1.93)	0.85 (0.46, 1.60)	0.83 (0.45, 1.53)	0.82 (0.44, 1.50)
Omega-6/TFA
Continuous	3.06 (2.67, 10.11)	3.35 (1.16, 10.75)	2.83 (1.31, 10.21)	1.72 (1.00, 3.95)	2.04 (1.02, 3.07)	1.68 (0.65, 3.36)
Q1	Ref			Ref
Q2	4.05 (1.49, 11.05)	4.66 (1.68, 10.94)	4.27 (2.84, 10.24)	1.78 (0.97, 3.26)	1.74 (0.94, 3.23)	1.48 (0.75, 2.91)
Q3	2.74 (1.02, 7.34)	2.70 (1.00, 7.29)	5.62 (1.63, 9.42)	2.29 (1.44, 3.63)	2.28 (1.42, 3.64)	2.27 (1.38, 3.74)
Q4	3.06 (1.14, 8.18)	2.99 (1.09, 8.21)	3.00 (1.94, 10.53)	2.37 (1.41, 4.00)	2.43 (1.44, 4.08)	2.35 (1.33, 4.16)
MUFA/TFA
Continuous	1.58 (0.50, 5.03)	1.12 (0.35, 3.57)	1.53 (0.46, 5.04)	1.78 (0.05, 2.84)	1.52 (0.04, 2.65)	1.50 (0.03, 2.64)
Q1	Ref			Ref
Q2	0.98 (0.49, 1.95)	0.96 (0.46, 2.00)	0.95 (0.44, 2.04)	1.36 (0.81, 2.29)	1.35 (0.79, 2.31)	1.25 (0.65, 2.38)
Q3	1.40 (0.68, 2.92)	1.24 (0.59, 2.63)	1.03 (0.42, 2.56)	1.41 (0.86, 2.29)	1.36 (0.82, 2.24)	1.25 (0.72, 2.17)
Q4	0.91 (0.39, 2.11)	0.83 (0.36, 1.94)	0.82 (0.32, 2.11)	1.15 (0.68, 1.95)	1.11 (0.64, 1.91)	1.12 (0.61, 2.06)
PUFA/TFA
Continuous	0.51 (0.01, 1.45)	0.34 (0.01, 1.81)	1.65 (0.02, 3.28)	0.44 (0.03, 1.90)	0.47 (0.03, 2.74)	0.65 (0.04, 1.45)
Q1	Ref			Ref
Q2	0.71 (0.30, 1.73)	0.73 (0.30, 1.79)	1.07 (0.37, 3.15)	1.01 (0.57, 1.78)	0.96 (0.54, 1.70)	0.80 (0.44, 1.45)
Q3	0.89 (0.42, 1.90)	0.81 (0.37, 1.78)	1.09 (0.44, 2.69)	1.15 (0.69, 1.92)	1.13 (0.69, 1.87)	1.11 (0.68, 1.79)
Q4	0.90 (0.40, 1.99)	0.83 (0.36, 1.95)	1.16 (0.43, 3.09)	0.87 (0.50, 1.52)	0.88 (0.52, 1.49)	0.85 (0.49, 1.47)

## Sheet: Table S6
Table S6. Detailed data for 49 SNPs as IVs in TSFA and infertility.
SNP	chr	pos	effect allele	other allele	beta of exposure	SE of exposure	pvalue of exposure	beta of outcome	SE of outcome	pvalue of outcome	R2	F
rs11620783	14	24871530	T	C	0.0218835	0.00415462	3.59998e-08	0.0029	0.0197	0.8844	0.000241197	27.7436
rs1890896	10	93641757	C	T	-0.0217743	0.00410364	4.39997e-08	-0.0042	0.0191	0.8267	0.000244765	28.1541
rs10810374	9	15306292	C	A	0.0257936	0.00476717	3.89996e-08	-0.0188	0.0212	0.3752	0.000254506	29.2749
rs2000999	16	72108093	A	G	0.0287218	0.00522617	2.39999e-08	-0.0183	0.0238	0.4434	0.000262572	30.2029
rs34120986	8	11692128	A	G	-0.0242497	0.00434125	3.50002e-08	-0.023	0.0198	0.245	0.000271251	31.2015
rs10884966	10	112185596	A	G	-0.0241254	0.00430359	1.89998e-08	0.0303	0.0195	0.1207	0.000273196	31.4253
rs4678438	3	136391195	C	A	0.0265901	0.00451494	2.99999e-10	0.0052	0.0214	0.8081	0.000301516	34.6839
rs60960031	2	21530659	A	G	-0.0249701	0.00417732	7.79992e-10	0.0294	0.0191	0.1233	0.00031061	35.7304
rs12263369	10	94823343	T	C	0.0252274	0.0041658	8.4004e-11	-0.012	0.019	0.528799	0.000318798	36.6725
rs6602911	13	114547372	T	C	0.0259862	0.00426141	1.89998e-09	0.0119	0.0197	0.5464	0.000323254	37.1853
rs7551124	1	23785760	T	C	0.037708	0.00617819	6.1e-10	0.0035	0.0296	0.9057	0.000323825	37.2509
rs6847980	4	88180631	T	G	0.0262768	0.00422146	2.80001e-10	0.0345	0.0204	0.0904191	0.000336806	38.7447
rs7118569	11	75526482	G	C	-0.044704	0.00714359	8.50002e-10	0.0485	0.0344	0.1586	0.000340422	39.1609
rs117488242	10	5261832	G	A	-0.0401499	0.00634095	1.5e-10	0.0629	0.0269	0.0193798	0.00034851	40.0915
rs11895352	2	20367135	T	C	-0.0260664	0.0041059	1.09999e-10	0.0018	0.019	0.9242	0.000350348	40.303
rs146203232	6	160543148	T	C	0.0498123	0.00782647	4.10015e-11	0.0503	0.0408	0.2181	0.000352123	40.5073
rs11429307	5	55857025	G	GT	-0.0335009	0.00521537	1.29999e-10	-0.0075	0.0275	0.785599	0.000358668	41.2606
rs11789603	9	107647019	T	C	0.0425819	0.00658623	2.19989e-11	-0.0198	0.0356	0.577301	0.000363349	41.7993
rs13108218	4	3443931	G	A	-0.0274688	0.0042362	2.09991e-11	-0.0079	0.0201	0.694201	0.000365488	42.0454
rs10504255	8	59398461	A	G	-0.028235	0.00434191	1.2e-10	-0.0209	0.0194	0.283	0.000367587	42.287
rs12740374	1	109817590	T	G	-0.0320708	0.00492429	4.10015e-11	-0.0166	0.0229	0.4677	0.000368704	42.4155
rs918106	12	109904318	T	C	0.0267869	0.00409256	5.10035e-12	-0.0158	0.0188	0.4026	0.000372391	42.8398
rs1883711	20	39179822	C	G	0.0800695	0.0120272	4.90004e-12	-0.0494	0.0393	0.2084	0.000385251	44.3198
rs632057	6	139834012	G	T	-0.0287854	0.0042315	7.19946e-11	-0.0351	0.0189	0.0636004	0.000402242	46.2752
rs7979473	12	121420260	G	A	-0.0290957	0.00423757	1.20005e-11	-0.0198	0.0191	0.3015	0.000409781	47.1429
rs1128249	2	165528624	T	G	-0.029496	0.00419136	6.4998e-13	-0.0379	0.0197	0.0549098	0.000430462	49.5232
rs739320	19	49261368	C	T	-0.0306084	0.00428547	2.70023e-12	-0.0133	0.0202	0.5108	0.000443402	51.0125
rs139974673	15	44027885	C	T	0.0937267	0.0128987	1.39991e-13	0.1213	0.1291	0.3475	0.000458925	52.7992
rs11076175	16	57006378	G	A	-0.0395606	0.00535883	2.29985e-13	0.0313	0.025	0.2099	0.000473681	54.4977
rs141469619	11	116714293	G	A	0.16013	0.0216223	2.29985e-15	0.2776	0.1547	0.07284	0.000476695	54.8446
rs102275	11	61557803	C	T	-0.032731	0.00427946	7.8001e-15	0.0181	0.019	0.3414	0.000508424	58.4969
rs56322906	19	11346155	A	G	-0.0869586	0.0111252	1.39991e-14	0.0004	0.0386	0.9908	0.000530988	61.0945
rs2740488	9	107661742	C	A	-0.0369738	0.0046467	7.59976e-15	-0.0222	0.0237	0.3489	0.000550257	63.3128
rs2126259	8	9185146	C	T	0.0581705	0.00679587	1.80011e-17	0.0353	0.0275	0.1985	0.000636715	73.2669
rs4704834	5	156443066	G	A	0.0382379	0.00426854	4.90004e-20	0.0376	0.0201	0.0609004	0.00069732	80.2457
rs28383314	6	32587213	C	T	0.0391406	0.00421979	6.4003e-20	0.024	0.0223	0.2818	0.000747574	86.0331
rs12151108	19	11197261	A	G	-0.0588191	0.00630154	5.40008e-21	-0.017	0.0309	0.5831	0.000757043	87.1236
rs2156552	18	47181668	T	A	0.0514191	0.00533633	4.40048e-21	0.0398	0.0247	0.1069	0.000806713	92.8445
rs4564803	2	21205502	T	G	-0.0492916	0.00486505	1.69981e-25	-0.0219	0.0209	0.2949	0.000891846	102.651
rs77960347	18	47109955	G	A	0.200754	0.017878	1.10002e-30	-0.0078	0.1092	0.9427	0.00109527	126.091
rs139315015	8	19893297	G	A	-0.082064	0.00665807	3.69999e-36	-0.0105	0.0329	0.7508	0.00131929	151.915
rs3812316	7	73020337	G	C	-0.0832736	0.00609467	5.00035e-42	-0.0008	0.028	0.9786	0.00162075	186.684
rs58542926	19	19379549	T	C	-0.116939	0.00780476	3.69999e-52	0.017	0.0381	0.6552	0.00194831	224.487
rs117733303	6	160922870	G	A	-0.242563	0.0151692	1.29987e-57	0.0275	0.089	0.7571	0.00221853	255.691
rs633695	15	58725839	G	A	0.0726336	0.00451479	7.50067e-58	0.0225	0.0204	0.271	0.00224559	258.817
rs10455872	6	161010118	G	A	-0.135858	0.00758241	5.30029e-73	-0.0355	0.0448	0.4279	0.00278388	321.032
rs1002687	1	62963737	A	G	0.0822227	0.00427545	1.39991e-84	-0.0057	0.0208	0.786001	0.00320576	369.839
rs261290	15	58678720	C	T	-0.101359	0.00431238	5.10505e-123	-0.0138	0.0192	0.4746	0.00478096	552.437
rs1260326	2	27730940	C	T	-0.105845	0.00418118	8.4918e-143	-0.027	0.0197	0.1703	0.0055416	640.819
Abbreviations: SNP: single nucleotide polymorphism; chr: chromosome; pos: position; R2: the proportion of exposure variance explained by SNPs; F: F-statistic.

## Sheet: Table S7
Table S7. Detailed data for 59 SNPs as IVs in MUFA and infertility.
SNP	chr	pos	effect allele	other allele	beta of exposure	SE of exposure	pvalue of exposure	beta of outcome	SE of outcome	pvalue of outcome	R2	F
rs1890896	10	93641757	C	T	-0.0215615	0.0040997	3.69999e-08	-0.0042	0.0191	0.8267	0.000240467	27.6596
rs998584	6	43757896	A	C	0.0221761	0.00409033	2e-08	-0.0105	0.0189	0.5802	0.000255534	29.3931
rs62222988	21	40569508	C	T	0.0230603	0.00423778	7.10003e-09	0.0147	0.0188	0.4354	0.000257423	29.6105
rs77697917	17	41840849	T	C	0.0667965	0.0122335	8.79995e-09	-0.1075	0.0541	0.0470695	0.000259179	29.8125
rs2035816	4	100508556	G	A	-0.0409444	0.00737341	1.29999e-08	0.0589	0.055	0.2839	0.000268066	30.8351
rs76895963	12	4384844	G	T	-0.0884025	0.0159059	3.2e-08	-0.0364	0.0563	0.5176	0.000268536	30.8891
rs67981690	12	21343886	G	A	0.0341029	0.00612933	8.10009e-09	0.0572	0.024	0.01714	0.00026912	30.9563
rs602633	1	109821511	G	T	0.0276023	0.0049476	5.30005e-09	0.0157	0.0228	0.491501	0.000270576	31.1239
rs12916	5	74656539	C	T	0.0233275	0.00417387	1.89998e-08	-0.0144	0.0188	0.4452	0.000271548	31.2357
rs6938550	6	20462138	A	G	-0.0410048	0.00729277	2e-08	-0.016	0.0284	0.573099	0.000274834	31.6138
rs7979473	12	121420260	G	A	-0.0239933	0.00423389	2.90001e-08	-0.0198	0.0191	0.3015	0.000279181	32.1139
rs12601919	17	65826861	G	A	0.0299626	0.00524174	1.09999e-08	-0.0161	0.0221	0.4656	0.000284047	32.6739
rs2000999	16	72108093	A	G	0.0301721	0.00522261	4.49997e-09	-0.0183	0.0238	0.4434	0.000290145	33.3755
rs2943635	2	227077377	T	C	0.0260799	0.00437945	6.29999e-09	0.0132	0.0198	0.5046	0.00030828	35.4622
rs2081687	8	59388565	C	T	-0.0259117	0.00432813	1.09999e-09	-0.012	0.0193	0.5336	0.000311574	35.8413
rs11940694	4	39414993	G	A	0.0254105	0.00421089	6.69993e-10	-0.007	0.0197	0.723701	0.000316553	36.4142
rs2478236	10	94797973	A	G	-0.0253693	0.00417358	2.99985e-11	0.0131	0.0191	0.4932	0.000321193	36.9481
rs6606725	12	109905368	A	C	0.025054	0.00411568	1.29999e-10	-0.0111	0.0191	0.562501	0.000322134	37.0564
rs2740488	9	107661742	C	A	-0.0284838	0.00464263	2.30001e-09	-0.0222	0.0237	0.3489	0.000327214	37.6409
rs142385484	19	50016759	T	C	-0.0359468	0.00583706	1.6e-10	0.033	0.0256	0.1985	0.000329682	37.9249
rs11895352	2	20367135	T	C	-0.0252595	0.00410066	2.5e-10	0.0018	0.019	0.9242	0.000329841	37.9432
rs534417	1	23784965	G	A	0.038351	0.00616073	2.19999e-10	0.0035	0.0296	0.9057	0.000336859	38.7509
rs60960031	2	21530659	A	G	-0.0261034	0.00417199	2.90001e-10	0.0294	0.0191	0.1233	0.000340303	39.1471
rs72555385	7	73123473	G	A	0.0610173	0.00948961	1.40001e-10	0.0691	0.0626	0.2703	0.000359384	41.343
rs3198697	16	15129940	T	C	-0.0272666	0.00416317	2.80027e-12	0.0208	0.0191	0.2749	0.00037287	42.8949
rs146203232	6	160543148	T	C	0.0518262	0.00781629	4.90004e-12	0.0503	0.0408	0.2181	0.000382153	43.9633
rs739320	19	49261368	C	T	-0.0284524	0.00428134	2.69998e-10	-0.0133	0.0202	0.5108	0.0003839	44.1642
rs7140110	13	114544024	C	T	0.0301226	0.00446696	5.70033e-12	0.0254	0.021	0.2248	0.000395271	45.473
rs1540037	18	47182664	G	A	0.034088	0.0050406	5.50047e-11	0.0305	0.0221	0.1676	0.000397532	45.7331
rs1394092	3	136196071	T	C	0.0311431	0.0045985	1.80011e-12	0.0131	0.0223	0.5564	0.00039868	45.8652
rs1052248	6	31556581	A	T	0.0317328	0.00467269	4.60002e-10	0.0144	0.0216	0.5038	0.00040088	46.1185
rs7679	20	44576502	C	T	0.0367426	0.00526144	1.69981e-13	-0.0119	0.0264	0.652299	0.000423889	48.7667
rs28752924	6	31303922	C	T	0.0300771	0.00423814	7.19996e-09	0.0195	0.0213	0.3592	0.000437761	50.3633
rs182611493	19	19458388	G	A	-0.140865	0.0196911	9.20026e-14	-0.0042	0.0429	0.9218	0.000444815	51.1751
rs1471251	4	87976359	T	A	0.0301172	0.00419507	1.69981e-13	0.0132	0.0192	0.4921	0.000447984	51.5399
rs632057	6	139834012	G	T	-0.0316017	0.004226	3.10027e-13	-0.0351	0.0189	0.0636004	0.000486023	55.9184
rs615632	8	9796321	T	C	0.0327656	0.00411194	4.10015e-15	0.015	0.0392	0.701601	0.000551835	63.4944
rs11429307	5	55857025	G	GT	-0.0426882	0.00521089	6.70039e-16	-0.0075	0.0275	0.785599	0.000583236	67.1095
rs1047964	11	117156893	T	G	-0.174574	0.0207969	1.59993e-17	0.1815	0.097	0.0614596	0.000612353	70.4619
rs1128249	2	165528624	T	G	-0.0352985	0.00418602	6.29941e-18	-0.0379	0.0197	0.0549098	0.000617942	71.1054
rs149615216	18	47106028	T	C	0.168772	0.0198467	2.19989e-18	-0.0087	0.1328	0.9477	0.00062843	72.313
rs13108218	4	3443931	G	A	-0.0376591	0.00423183	6.09958e-20	-0.0079	0.0201	0.694201	0.000688162	79.191
rs139974673	15	44027885	C	T	0.121036	0.0128925	1.69981e-21	0.1213	0.1291	0.3475	0.000765822	88.1348
rs1561748	8	19733244	C	G	-0.0468503	0.0049829	1.99986e-21	-0.0215	0.0268	0.4231	0.000768126	88.4001
rs4704834	5	156443066	G	A	0.0442556	0.00426487	2.19989e-26	0.0376	0.0201	0.0609004	0.000935458	107.676
rs9271573	6	32590501	C	A	0.0435035	0.00415738	6.00067e-25	0.0227	0.0209	0.2777	0.000951265	109.497
rs116843064	19	8429323	A	G	-0.163051	0.0146631	3.80014e-29	-0.0299	0.0576	0.6033	0.00107407	123.648
rs141469619	11	116714293	G	A	0.242069	0.0215967	5.40008e-32	0.2776	0.1547	0.07284	0.00109128	125.631
rs633695	15	58725839	G	A	0.0557906	0.00451263	2.09991e-35	0.0225	0.0204	0.271	0.00132737	152.846
rs4564803	2	21205502	T	G	-0.0716703	0.00485884	5.10035e-50	-0.0219	0.0209	0.2949	0.00188842	217.573
rs174564	11	61588305	G	A	0.0643792	0.00428375	3.29989e-52	0.0195	0.019	0.3049	0.00196018	225.858
rs58542926	19	19379549	T	C	-0.117636	0.00779724	9.8992e-53	0.017	0.0381	0.6552	0.00197536	227.61
rs261290	15	58678720	C	T	-0.0737819	0.00431032	8.99912e-67	-0.0138	0.0192	0.4746	0.00254145	293.004
rs117733303	6	160922870	G	A	-0.262622	0.0151495	1.20005e-67	0.0275	0.089	0.7571	0.00260638	300.509
rs3812316	7	73020337	G	C	-0.113499	0.00608971	1.29987e-76	-0.0008	0.028	0.9786	0.00301153	347.363
rs10455872	6	161010118	G	A	-0.148849	0.00757255	9.20026e-89	-0.0355	0.0448	0.4279	0.00334855	386.367
rs328	8	19819724	G	C	-0.142903	0.00678339	1.09901e-101	-0.0113	0.033	0.731799	0.00384434	443.794
rs1002687	1	62963737	A	G	0.0911088	0.00427005	6.39735e-105	-0.0057	0.0208	0.786001	0.00394316	455.247
rs1260326	2	27730940	C	T	-0.110558	0.00417585	1.69824e-158	-0.027	0.0197	0.1703	0.00605839	700.944

## Sheet: Table S8
Table S8. Detailed data for 57 SNPs as IVs in PUFA and infertility.
SNP	chr	pos	effect allele	other allele	beta of exposure	SE of exposure	pvalue of exposure	beta of outcome	SE of outcome	pvalue of outcome	R2	F
rs2229738	11	68562328	T	C	-0.0410344	0.00808345	3.59998e-08	-0.021	0.0263	0.425	0.000224033	25.7689
rs157585	19	45403858	C	A	0.0212466	0.00404793	4.60002e-08	0.0116	0.0188	0.5371	0.000239505	27.549
rs73013176	19	11147526	C	T	-0.102018	0.0193941	2.90001e-08	0.1037	0.1385	0.4542	0.000240556	27.6698
rs5754102	22	21927231	A	C	-0.0288301	0.00526871	2.30001e-08	-0.0231	0.0202	0.2545	0.000260301	29.9417
rs10096633	8	19830921	T	C	-0.0339303	0.00610477	3.09999e-08	-0.0031	0.0317	0.9211	0.000268551	30.8908
rs2378390	20	34154937	A	G	-0.0324241	0.00581303	1.2e-08	-0.0271	0.0328	0.4089	0.00027047	31.1117
rs9616847	22	50868669	T	A	0.0234318	0.00415401	3.50002e-08	0.0123	0.019	0.5162	0.000276606	31.8177
rs4986970	16	67976320	T	A	-0.0638502	0.011169	1.09999e-08	0.0892	0.0557	0.1091	0.000284105	32.6805
rs3822855	6	116316882	T	G	0.0235759	0.00410926	6.4e-09	-0.021	0.0189	0.2671	0.000286148	32.9156
rs141469619	11	116714293	G	A	0.125151	0.0212786	1.29999e-10	0.2776	0.1547	0.07284	0.000300717	34.5919
rs59774409	19	50016748	T	C	0.0427981	0.00727468	4.39997e-09	0.0165	0.0456	0.7165	0.000300882	34.611
rs3770586	2	169828995	T	C	-0.0238966	0.00404591	1e-09	0.0012	0.0191	0.9515	0.000303259	34.8845
rs4561509	17	45781799	A	G	0.0239181	0.00404085	7.59994e-10	-0.0232	0.0188	0.2183	0.000304566	35.0349
rs1800961	20	43042364	T	C	-0.0717226	0.0117677	1.6e-09	-0.0297	0.0453	0.5119	0.00032292	37.1468
rs115413710	6	31180819	C	T	0.0604013	0.0097982	8.10028e-12	0.0639	0.0384	0.096221	0.000330341	38.0008
rs75406471	10	5257647	A	G	-0.0352293	0.00558407	4.20001e-10	0.0629	0.0269	0.0193798	0.000345989	39.8014
rs7707394	5	74472939	A	G	0.0265334	0.0041973	1.5e-10	-0.0103	0.0194	0.5955	0.000347377	39.9612
rs2737245	8	116658583	T	G	-0.0285112	0.00450206	2e-10	0.0207	0.0204	0.3097	0.000348629	40.1052
rs534417	1	23784965	G	A	0.0385998	0.00607001	1.09999e-10	0.0035	0.0296	0.9057	0.000351516	40.4374
rs4008004	9	15306292	A	C	0.0320614	0.00486982	3.80014e-11	-0.0188	0.0212	0.3752	0.000376774	43.3443
rs6602911	13	114547372	T	C	0.0279094	0.00419569	5.79963e-11	0.0119	0.0197	0.5464	0.000384621	44.2473
rs2326077	8	59385919	T	C	-0.0284526	0.00426919	1.59993e-11	-0.0127	0.0193	0.5104	0.000386092	44.4166
rs114863007	6	34729158	A	G	-0.0480587	0.00692094	4.10015e-13	0.0189	0.0269	0.4825	0.000419119	48.2177
rs115478735	9	136149711	T	A	0.0373598	0.00521074	7.39946e-14	0.0587	0.0236	0.01276	0.000446809	51.4047
rs4860948	4	69340991	A	T	0.0337639	0.00470169	4.90004e-13	-0.0171	0.022	0.4384	0.000448238	51.5691
rs34955778	16	15139594	C	T	-0.029365	0.00408638	1.29987e-12	0.0043	0.0189	0.8195	0.000448842	51.6387
rs4299376	2	44072576	T	G	-0.0315084	0.00431374	7.29962e-14	0.0127	0.0228	0.577301	0.000463713	53.3503
rs11789603	9	107647019	T	C	0.04771	0.00648318	7.59976e-14	-0.0198	0.0356	0.577301	0.0004707	54.1546
rs7970695	12	121423376	A	G	-0.032523	0.00415946	1.99986e-15	-0.019	0.0192	0.3226	0.000531352	61.1364
rs1883711	20	39179822	C	G	0.09328	0.0118393	9.49948e-17	-0.0494	0.0393	0.2084	0.000539506	62.0751
rs870526	2	20369562	T	C	-0.0321934	0.00403392	2.80027e-16	0.0033	0.0192	0.863	0.000553534	63.69
rs13108218	4	3443931	G	A	-0.0343116	0.00417075	1.59993e-17	-0.0079	0.0201	0.694201	0.000588172	67.6778
rs6547409	2	21190209	T	C	-0.084643	0.00923521	4.30031e-22	-0.0375	0.0351	0.2853	0.000729924	84.0003
rs72997616	11	75474195	A	C	-0.0647308	0.00693225	8.4004e-21	0.04	0.0307	0.1934	0.000757618	87.1899
rs56322906	19	11346155	A	G	-0.104445	0.0109466	2.19989e-21	0.0004	0.0386	0.9908	0.000791005	91.0352
rs6938647	6	160986915	C	A	-0.0475077	0.00494185	3.29989e-23	-0.0209	0.0241	0.385	0.000802982	92.4148
rs28383314	6	32587213	C	T	0.0403992	0.00415433	1.69981e-19	0.024	0.0223	0.2818	0.000821661	94.5662
rs3843482	5	74639259	G	T	0.0424902	0.00416334	2.70023e-25	-0.0129	0.0189	0.4935	0.000904912	104.156
rs2740488	9	107661742	C	A	-0.049166	0.004574	7.19946e-27	-0.0222	0.0237	0.3489	0.00100371	115.539
rs6882345	5	156397673	A	G	0.0456949	0.0041739	3.59998e-29	0.0372	0.02	0.0628304	0.00104113	119.852
rs12740374	1	109817590	T	G	-0.0589449	0.00484565	3.29989e-34	-0.0166	0.0229	0.4677	0.0012851	147.972
rs55747707	7	73037366	A	G	-0.0611785	0.00501785	5.90065e-34	-0.0159	0.0245	0.5156	0.00129094	148.647
rs9295128	6	160751531	T	G	-0.203104	0.0159328	2.90001e-39	0.0861	0.0871	0.323	0.00141106	162.497
rs1461729	8	9187242	G	A	0.0858304	0.0066974	1.29987e-38	0.0354	0.0275	0.1976	0.00142612	164.234
rs672889	2	21319016	G	T	0.0748648	0.00579704	7.29962e-41	0.0007	0.0266	0.9785	0.00144817	166.777
rs183130	16	56991363	T	C	0.0559719	0.00430633	7.19946e-41	0.0027	0.0209	0.8977	0.00146688	168.934
rs9304381	18	47158234	T	C	0.0738115	0.00523016	3.80014e-46	0.0409	0.0246	0.0967008	0.00172891	199.164
rs142158911	19	11190534	A	G	-0.0922557	0.00631055	6.70039e-50	-0.0148	0.0308	0.6317	0.00185503	213.72
rs77960347	18	47109955	G	A	0.276962	0.017596	5.70033e-58	-0.0078	0.1092	0.9427	0.00214973	247.745
rs112875651	8	126506694	A	G	-0.07727	0.00418284	4.60045e-78	-0.0099	0.0192	0.607	0.00295868	341.249
rs1260326	2	27730940	C	T	-0.0762658	0.00411631	1.59993e-77	-0.027	0.0197	0.1703	0.00297615	343.27
rs633695	15	58725839	G	A	0.0838432	0.0044443	1.10002e-79	0.0225	0.0204	0.271	0.00308527	355.895
rs58542926	19	19379549	T	C	-0.152376	0.00767948	1.50003e-91	0.017	0.0381	0.6552	0.00341186	393.697
rs1002687	1	62963737	A	G	0.0959946	0.00420718	1.99986e-120	-0.0057	0.0208	0.786001	0.00450667	520.6
rs102275	11	61557803	C	T	-0.0974089	0.00421144	3.1989e-125	0.0181	0.019	0.3414	0.00463048	534.969
rs964184	11	116648917	C	G	-0.15015	0.00593524	5.19996e-146	0.0171	0.0266	0.5209	0.00553439	639.98
rs261290	15	58678720	C	T	-0.112315	0.00424505	1.1995e-157	-0.0138	0.0192	0.4746	0.00605035	700.007

## Sheet: Table S9
Table S9. Detailed data for 48 SNPs as IVs in omega-3 and infertility.
SNP	chr	pos	effect allele	other allele	beta of exposure	SE of exposure	pvalue of exposure	beta of outcome	SE of outcome	pvalue of outcome	R2	F
rs35135293	2	20363666	T	C	-0.0208868	0.00408348	3.89996e-08	-0.0056	0.019	0.768	0.000227452	26.1623
rs144018203	11	116916060	C	G	0.107134	0.02049	4.20001e-08	0.2941	0.1523	0.05339	0.000237669	27.3378
rs1672811	16	15501099	C	T	0.0251849	0.0046967	2.99999e-08	-0.0052	0.021	0.8044	0.000249972	28.7533
rs11563251	2	234679384	T	C	0.0349727	0.00647476	3.2e-08	-0.0204	0.0315	0.517201	0.000253634	29.1745
rs13424225	2	241214158	T	G	0.0221268	0.00408591	2.19999e-08	-0.0059	0.0188	0.7546	0.00025495	29.3259
rs11681659	2	136820960	T	C	-0.0251255	0.004486	2e-08	0.0468	0.0193	0.0153801	0.000272708	31.3692
rs73109460	7	44792326	A	G	-0.0349475	0.006216	9.20005e-10	-0.0015	0.036	0.9678	0.000274787	31.6084
rs6693447	1	2330190	G	T	0.0229488	0.00407772	4.79999e-09	-0.0094	0.0188	0.616	0.000275341	31.6722
rs7924036	10	65191645	T	G	0.0233527	0.00406452	5.49997e-10	-0.0214	0.0188	0.2537	0.00028697	33.0102
rs6129624	20	39167592	A	G	-0.0257607	0.00437946	5.1e-10	-0.0262	0.0207	0.2049	0.00030078	34.5992
rs11242109	5	131677047	T	G	0.0240622	0.0040658	2.39999e-09	0.0142	0.0198	0.4729	0.000304475	35.0244
rs34663616	15	58569330	A	C	0.0356728	0.00602277	4.39997e-10	-0.0354	0.0268	0.1855	0.000304969	35.0812
rs1800978	9	107665978	G	C	-0.0373414	0.00619432	5.19996e-09	-0.0201	0.031	0.5182	0.000315909	36.3401
rs7970695	12	121423376	A	G	-0.0253039	0.00419603	1.2e-10	-0.019	0.0192	0.3226	0.00031613	36.3656
rs6601924	10	5247302	C	T	0.0350603	0.00563873	8.50002e-10	-0.0627	0.0269	0.0198002	0.000336069	38.6599
rs7819706	8	19844415	G	A	-0.0396447	0.00628878	1.79999e-10	-0.0039	0.0322	0.9032	0.000345456	39.7402
rs117143374	21	40555561	C	T	-0.0370966	0.005847	2.19999e-10	-0.0008	0.0306	0.9799	0.00034991	40.2526
rs4000713	7	25990597	A	G	-0.0288196	0.00446039	1e-11	0.0237	0.0201	0.2392	0.000362893	41.7468
rs3129962	6	32379383	A	G	-0.0392017	0.00603734	1.79999e-09	0.0149	0.0468	0.7504	0.000366493	42.161
rs737338	19	11347657	T	C	-0.0726631	0.0110354	3.50026e-11	0.0037	0.0385	0.9245	0.000376872	43.3555
rs1132899	19	45448036	C	T	0.0270834	0.00410188	8.60003e-11	0.0396	0.019	0.0370203	0.00037895	43.5946
rs55891451	10	96728169	C	A	0.0341853	0.00508075	4.60045e-12	0.0447	0.024	0.0627307	0.000393512	45.2705
rs6882345	5	156397673	A	G	0.0288844	0.00421159	1.9002e-13	0.0372	0.02	0.0628304	0.000408849	47.0356
rs16940904	17	44186063	T	C	-0.0355285	0.0048772	3.90032e-14	0.0719	0.0341	0.0347496	0.000461231	53.0646
rs10184054	2	21203877	G	C	-0.0361462	0.00486548	5.60015e-15	-0.0192	0.021	0.3604	0.000479702	55.1908
rs143355652	11	61453822	T	C	-0.154138	0.0204073	9.3994e-14	0.1691	0.1056	0.1092	0.000495837	57.048
rs117733303	6	160922870	G	A	-0.115945	0.0150731	1.39991e-15	0.0275	0.089	0.7571	0.000514258	59.1686
rs3018731	11	61248776	G	A	-0.0353357	0.00456603	1.99986e-14	0.0031	0.0241	0.8973	0.000520511	59.8883
rs629301	1	109818306	T	G	0.0382887	0.00488385	1.29987e-14	0.0166	0.0229	0.469	0.000534184	61.4623
rs9987289	8	9183358	G	A	0.0566995	0.00707191	3.19963e-16	0.0309	0.0283	0.2744	0.000558661	64.2802
rs10455872	6	161010118	G	A	-0.0629576	0.00753435	2.80027e-17	-0.0355	0.0448	0.4279	0.000606802	69.8228
rs2394976	6	31311912	T	G	-0.0461429	0.00550837	1.20005e-15	-0.0089	0.0312	0.776201	0.000609824	70.1707
rs77960347	18	47109955	G	A	0.161749	0.0177574	7.19946e-22	-0.0078	0.1092	0.9427	0.00072097	82.9692
rs139974673	15	44027885	C	T	0.117987	0.0128075	2.29985e-21	0.1213	0.1291	0.3475	0.000737437	84.8657
rs4860987	4	69491284	T	A	0.0463493	0.00491057	1.20005e-21	-0.0405	0.0216	0.0614497	0.000774091	89.0871
rs12226389	11	61823630	C	T	-0.050608	0.00524839	1.10002e-22	-0.0166	0.0246	0.5008	0.000807869	92.9777
rs9304381	18	47158234	T	C	0.0528854	0.00527814	5.19996e-24	0.0409	0.0246	0.0967008	0.000872241	100.393
rs182611493	19	19458388	G	A	-0.209571	0.0195777	1.10002e-27	-0.0042	0.0429	0.9218	0.000995434	114.586
rs673335	11	75450576	C	T	-0.0669996	0.00554146	1.10002e-34	0.0017	0.022	0.939	0.00126955	146.18
rs62466318	7	73042085	T	C	-0.0721329	0.00506371	1.20005e-45	-0.0197	0.0239	0.4082	0.00176145	202.918
rs1167998	1	62931632	A	C	0.0713574	0.00425038	3.59998e-66	-0.0064	0.0208	0.757699	0.00244492	281.848
rs72789541	16	15127534	A	T	-0.0810999	0.00446068	5.60015e-75	0.0018	0.0201	0.93	0.00286614	330.545
rs633695	15	58725839	G	A	0.0840069	0.00448287	9.09913e-80	0.0225	0.0204	0.271	0.00304438	351.164
rs964184	11	116648917	C	G	-0.116637	0.00596503	8.9002e-87	0.0171	0.0266	0.5209	0.00331369	382.331
rs1260326	2	27730940	C	T	-0.0820592	0.0041534	8.4004e-88	-0.027	0.0197	0.1703	0.00338284	390.337
rs112875651	8	126506694	A	G	-0.0873719	0.00422001	3.50026e-98	-0.0099	0.0192	0.607	0.0037137	428.656
rs58542926	19	19379549	T	C	-0.171666	0.00775231	1.39959e-113	0.017	0.0381	0.6552	0.00424585	490.342
rs261290	15	58678720	C	T	-0.114383	0.00428189	3.89942e-161	-0.0138	0.0192	0.4746	0.00616696	713.583

## Sheet: Table S10
Table S10. Detailed data for 52 SNPs as IVs in omega-6 and infertility.
SNP	chr	pos	effect allele	other allele	beta of exposure	SE of exposure	pvalue of exposure	beta of outcome	SE of outcome	pvalue of outcome	R2	F
rs141469619	11	116714293	G	A	0.110551	0.0213113	1.40001e-08	0.2776	0.1547	0.07284	0.000233943	26.909
rs4439799	17	45781599	T	C	0.0224228	0.00404559	1.29999e-08	-0.0228	0.0188	0.2257	0.000267058	30.7191
rs6934962	6	116322349	T	C	0.0228258	0.00411241	2.19999e-08	-0.021	0.019	0.2681	0.000267824	30.8072
rs740516	17	67082962	G	C	-0.0315718	0.00565892	1.40001e-08	0.0128	0.0235	0.586001	0.000270595	31.1261
rs7750288	6	160400147	G	A	0.0249212	0.00446247	1.29999e-08	0.005	0.0211	0.8115	0.000271129	31.1874
rs75406471	10	5257647	A	G	-0.0314077	0.00559075	2.69998e-08	0.0629	0.0269	0.0193798	0.000274359	31.5591
rs3770586	2	169828995	T	C	-0.0229674	0.00405156	7.10003e-09	0.0012	0.0191	0.9515	0.00027936	32.1345
rs2378390	20	34154937	A	G	-0.0333321	0.00581966	3.2e-09	-0.0271	0.0328	0.4089	0.000285175	32.8037
rs9616847	22	50868669	T	A	0.023821	0.00415851	1.40001e-08	0.0123	0.019	0.5162	0.000285251	32.8123
rs3734854	6	31078836	A	G	0.0477116	0.0082133	5.90065e-11	0.0727	0.0335	0.0301599	0.000293353	33.7447
rs4860948	4	69340991	A	T	0.027907	0.00470731	1.89998e-09	-0.0171	0.022	0.4384	0.00030553	35.1458
rs5754102	22	21927231	A	C	-0.0316	0.00527441	9.90011e-10	-0.0231	0.0202	0.2545	0.00031203	35.8938
rs2737245	8	116658583	T	G	-0.0274764	0.00450795	1.40001e-09	0.0207	0.0204	0.3097	0.000322944	37.1496
rs6602911	13	114547372	T	C	0.0257493	0.00420044	1.29999e-09	0.0119	0.0197	0.5464	0.000326667	37.578
rs1800961	20	43042364	T	C	-0.0744567	0.0117812	3.29997e-10	-0.0297	0.0453	0.5119	0.000347203	39.9412
rs534417	1	23784965	G	A	0.0390397	0.00607823	9.30037e-11	0.0035	0.0296	0.9057	0.000358599	41.2526
rs3817335	11	47643891	A	T	-0.0277621	0.00421464	9.79941e-12	-0.0072	0.0202	0.7206	0.00037716	43.3886
rs114863007	6	34729158	A	G	-0.0457294	0.00693029	7.29962e-12	0.0189	0.0269	0.4825	0.000378468	43.5392
rs4008004	9	15306292	A	C	0.0329594	0.00487542	8.4004e-12	-0.0188	0.0212	0.3752	0.000397254	45.7011
rs6471717	8	59377357	A	G	-0.0290285	0.00427754	4.00037e-12	-0.0134	0.0193	0.4893	0.000400307	46.0525
rs7707394	5	74472939	A	G	0.02951	0.00420247	1.20005e-12	-0.0103	0.0194	0.5955	0.000428597	49.3085
rs7139079	12	121415293	A	G	-0.0297379	0.00411541	3.29989e-13	-0.0253	0.019	0.1816	0.00045384	52.214
rs11789603	9	107647019	T	C	0.0478798	0.00649064	9.70063e-14	-0.0198	0.0356	0.577301	0.000472966	54.4154
rs72997616	11	75474195	A	C	-0.051564	0.00694288	1.59993e-13	0.04	0.0307	0.1934	0.000479415	55.1577
rs1883711	20	39179822	C	G	0.0922513	0.0118528	3.19963e-16	-0.0494	0.0393	0.2084	0.000526478	60.5753
rs870526	2	20369562	T	C	-0.0318914	0.00403955	7.70016e-16	0.0033	0.0192	0.863	0.000541691	62.3266
rs115478735	9	136149711	T	A	0.0422787	0.00521674	2.19989e-17	0.0587	0.0236	0.01276	0.000570825	65.6806
rs4299376	2	44072576	T	G	-0.0353905	0.00431976	1.10002e-16	0.0127	0.0228	0.577301	0.00058332	67.1192
rs79429216	19	45445517	A	G	0.15083	0.0179625	1.29987e-17	0.0429	0.1501	0.774901	0.000612748	70.5073
rs13108218	4	3443931	G	A	-0.035165	0.00417574	3.59998e-18	-0.0079	0.0201	0.694201	0.000616301	70.9164
rs6547409	2	21190209	T	C	-0.0813514	0.00924809	2.39994e-20	-0.0375	0.0351	0.2853	0.000672419	77.3782
rs56322906	19	11346155	A	G	-0.100371	0.0109592	1.20005e-19	0.0004	0.0386	0.9908	0.000728867	83.8786
rs28383314	6	32587213	C	T	0.0388549	0.00415994	1.69981e-18	0.024	0.0223	0.2818	0.000758043	87.2388
rs1081105	19	45412955	C	A	0.118778	0.0123322	1.80011e-22	0.0369	0.0651	0.5709	0.000806022	92.7648
rs6938647	6	160986915	C	A	-0.0481657	0.00494853	1.9002e-23	-0.0209	0.0241	0.385	0.000823136	94.7362
rs55747707	7	73037366	A	G	-0.0494876	0.0050239	1.69981e-22	-0.0159	0.0245	0.5156	0.000843044	97.0294
rs6882345	5	156397673	A	G	0.0448784	0.00417905	1.20005e-27	0.0372	0.02	0.0628304	0.00100182	115.322
rs2740488	9	107661742	C	A	-0.0501345	0.00457926	5.40008e-28	-0.0222	0.0237	0.3489	0.00104121	119.86
rs12740374	1	109817590	T	G	-0.0572469	0.00485222	1.50003e-32	-0.0166	0.0229	0.4677	0.00120894	139.192
rs9295128	6	160751531	T	G	-0.196375	0.0159543	3.40017e-36	0.0861	0.0871	0.323	0.00131568	151.499
rs1461729	8	9187242	G	A	0.0835465	0.00670616	2.80027e-36	0.0354	0.0275	0.1976	0.00134781	155.203
rs672889	2	21319016	G	T	0.0763943	0.00580512	1.29987e-41	0.0007	0.0266	0.9785	0.00150367	173.178
rs9304381	18	47158234	T	C	0.0702336	0.00523609	7.19946e-42	0.0409	0.0246	0.0967008	0.00156208	179.915
rs183130	16	56991363	T	C	0.0615133	0.00431123	1.39991e-48	0.0027	0.0209	0.8977	0.00176715	203.577
rs142158911	19	11190534	A	G	-0.0944019	0.00631781	5.19996e-52	-0.0148	0.0308	0.6317	0.00193772	223.265
rs112875651	8	126506694	A	G	-0.063694	0.00418831	2.19989e-53	-0.0099	0.0192	0.607	0.00200703	231.266
rs1260326	2	27730940	C	T	-0.0642561	0.00412206	3.90032e-55	-0.027	0.0197	0.1703	0.00210858	242.992
rs77960347	18	47109955	G	A	0.275526	0.0176159	2.80027e-56	-0.0078	0.1092	0.9427	0.00212275	244.629
rs633695	15	58725839	G	A	0.0725178	0.00445048	1.29987e-59	0.0225	0.0204	0.271	0.00230346	265.502
rs58542926	19	19379549	T	C	-0.128057	0.0076883	2.49977e-65	0.017	0.0381	0.6552	0.00240661	277.42
rs1002687	1	62963737	A	G	0.090971	0.00421287	1e-107	-0.0057	0.0208	0.786001	0.0040383	466.275
rs261290	15	58678720	C	T	-0.0965507	0.00425095	1e-116	-0.0138	0.0192	0.4746	0.00446582	515.859

[truncated: 6 more sheets: Table S11, Table S12, Table S13, Table S14, Table S15, Table S16]
